# Supplementary material for: Dominant integration locus drives continuous diversification of plant immune receptors with exogenous domain fusions
Source: PubMed Central journal article supplement (PMC5819176; doi:10.1186/s13059-018-1392-6), 2018-02-19

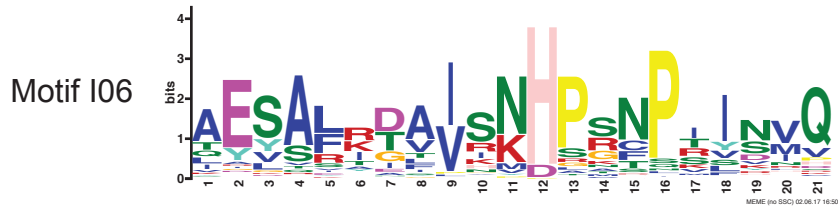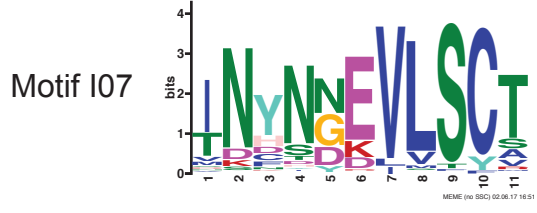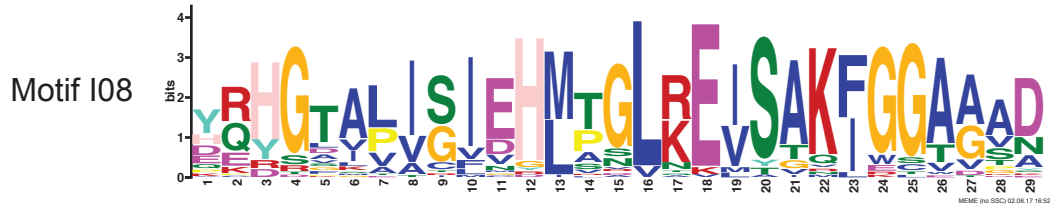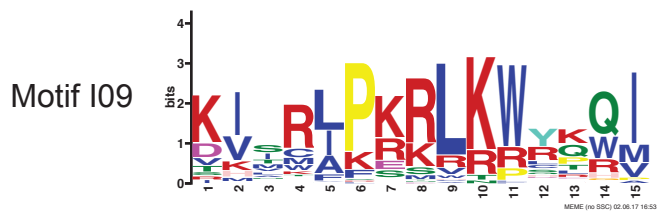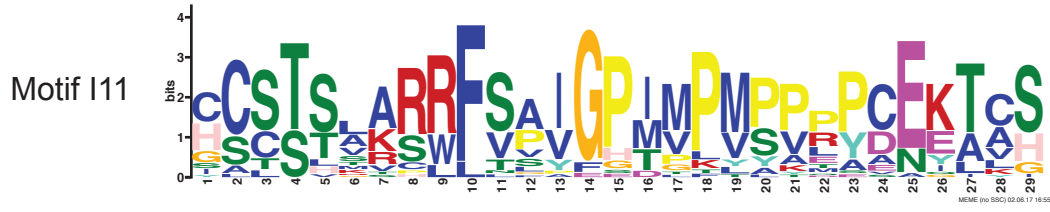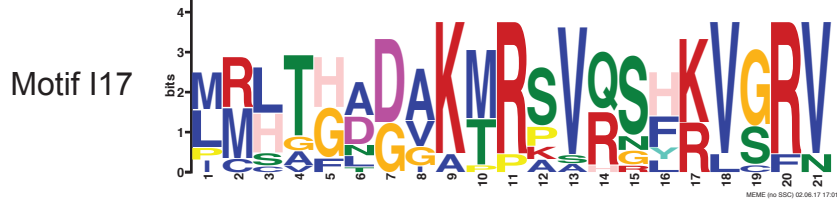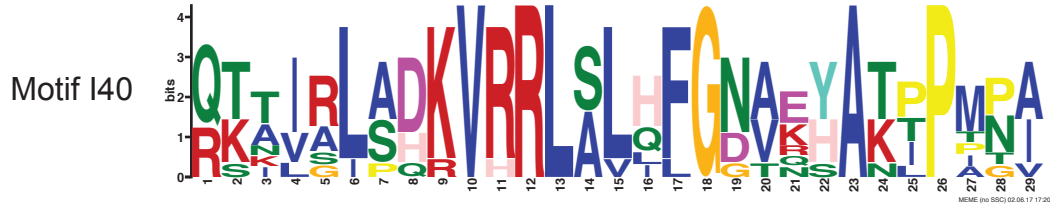

Supplement: 13059_2018_1392_MOESM6_ESM.pdf [file 13059_2018_1392_MOESM6_ESM.pdf]
