# Supplementary material for: Dominant integration locus drives continuous diversification of plant immune receptors with exogenous domain fusions
Source: PubMed Central journal article supplement (PMC5819176; doi:10.1186/s13059-018-1392-6), 2018-02-19

*O. sativa* – Total number of NLRs

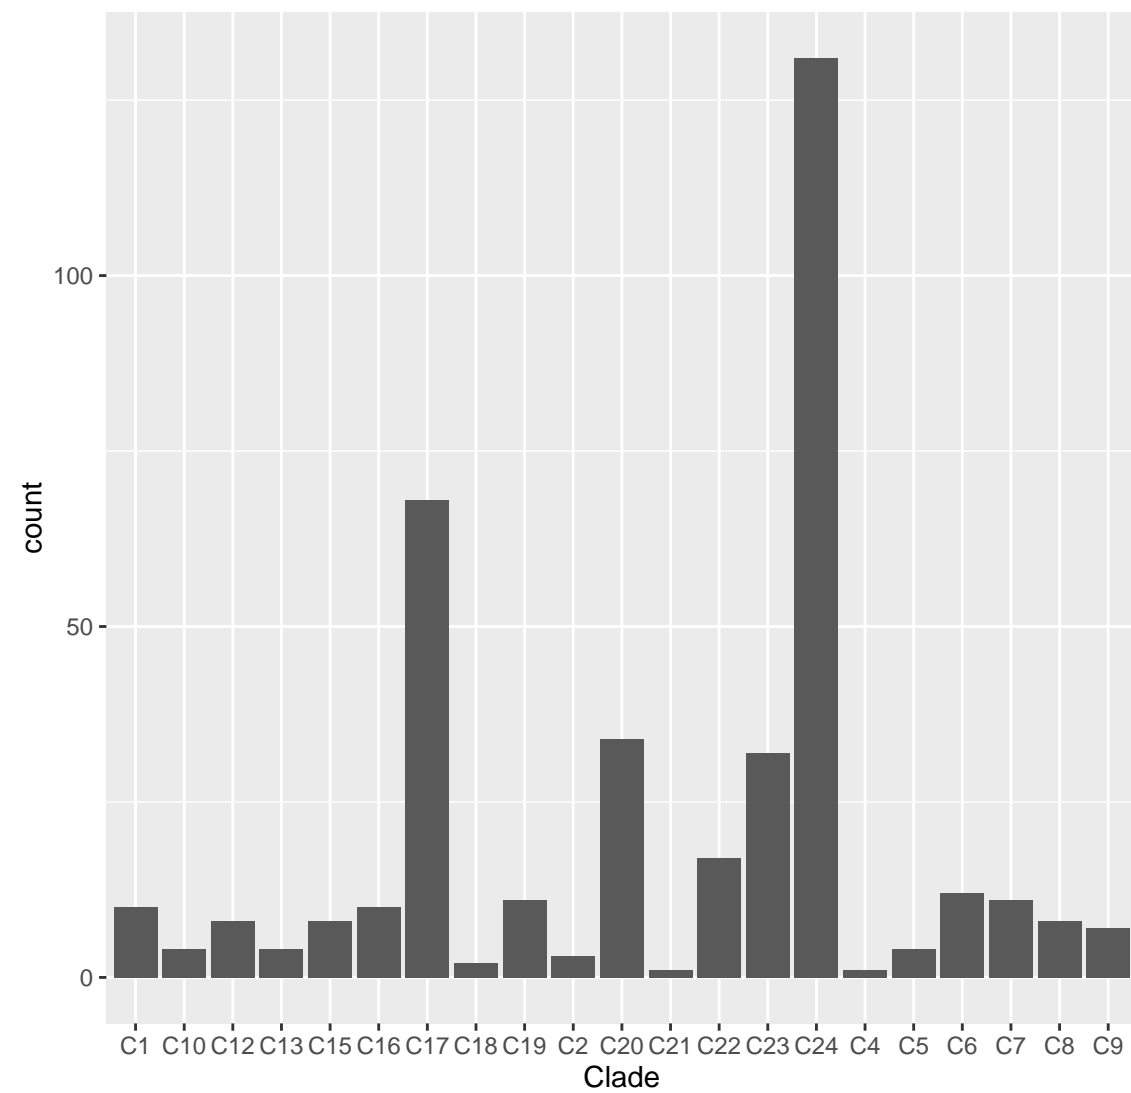

*T. aestivum* – Total number of NLRs

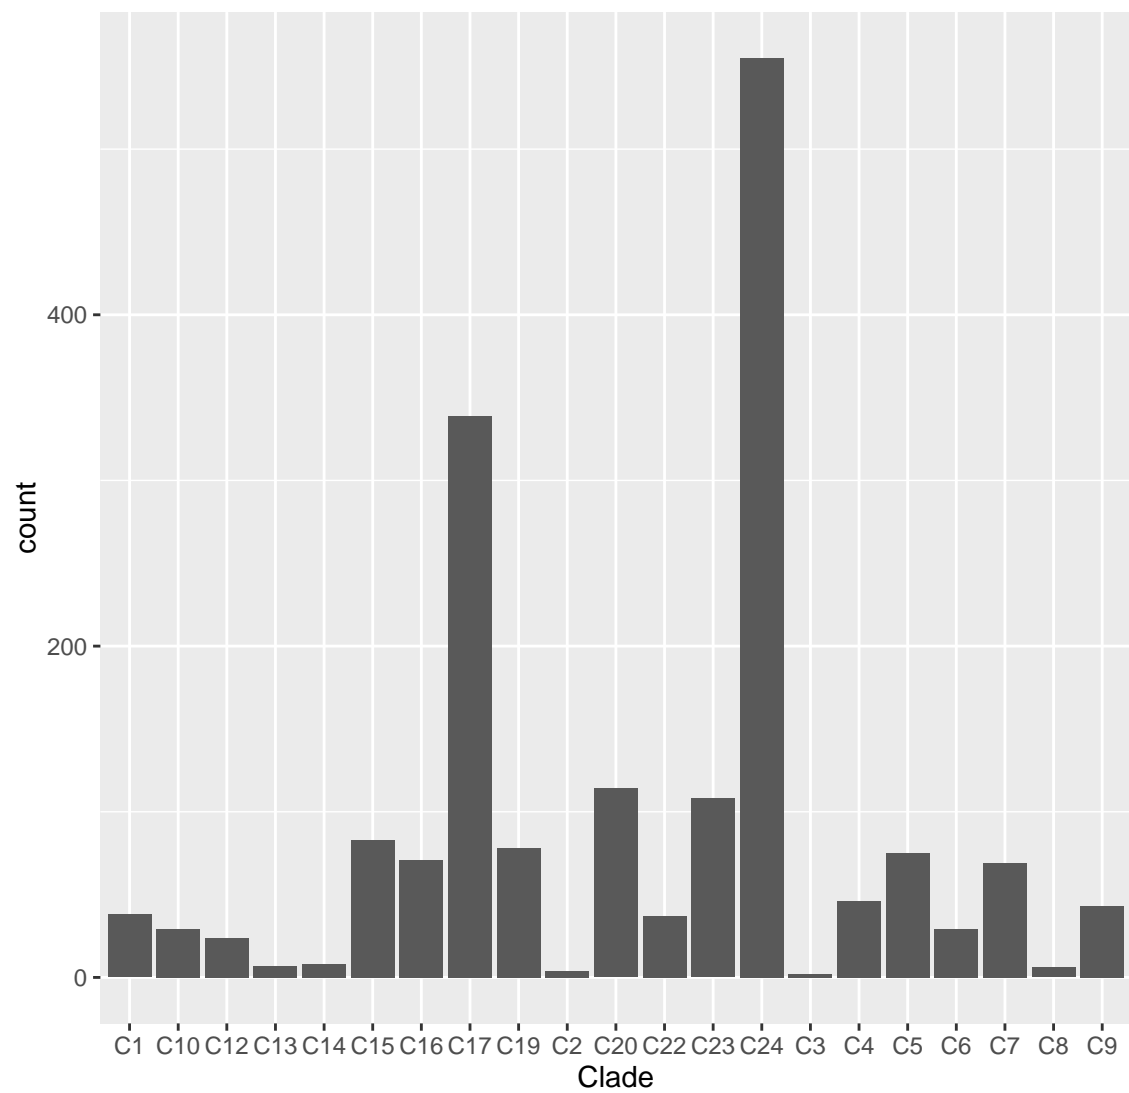

*O. sativa* – Percent NLRs that overlap with Helitrons

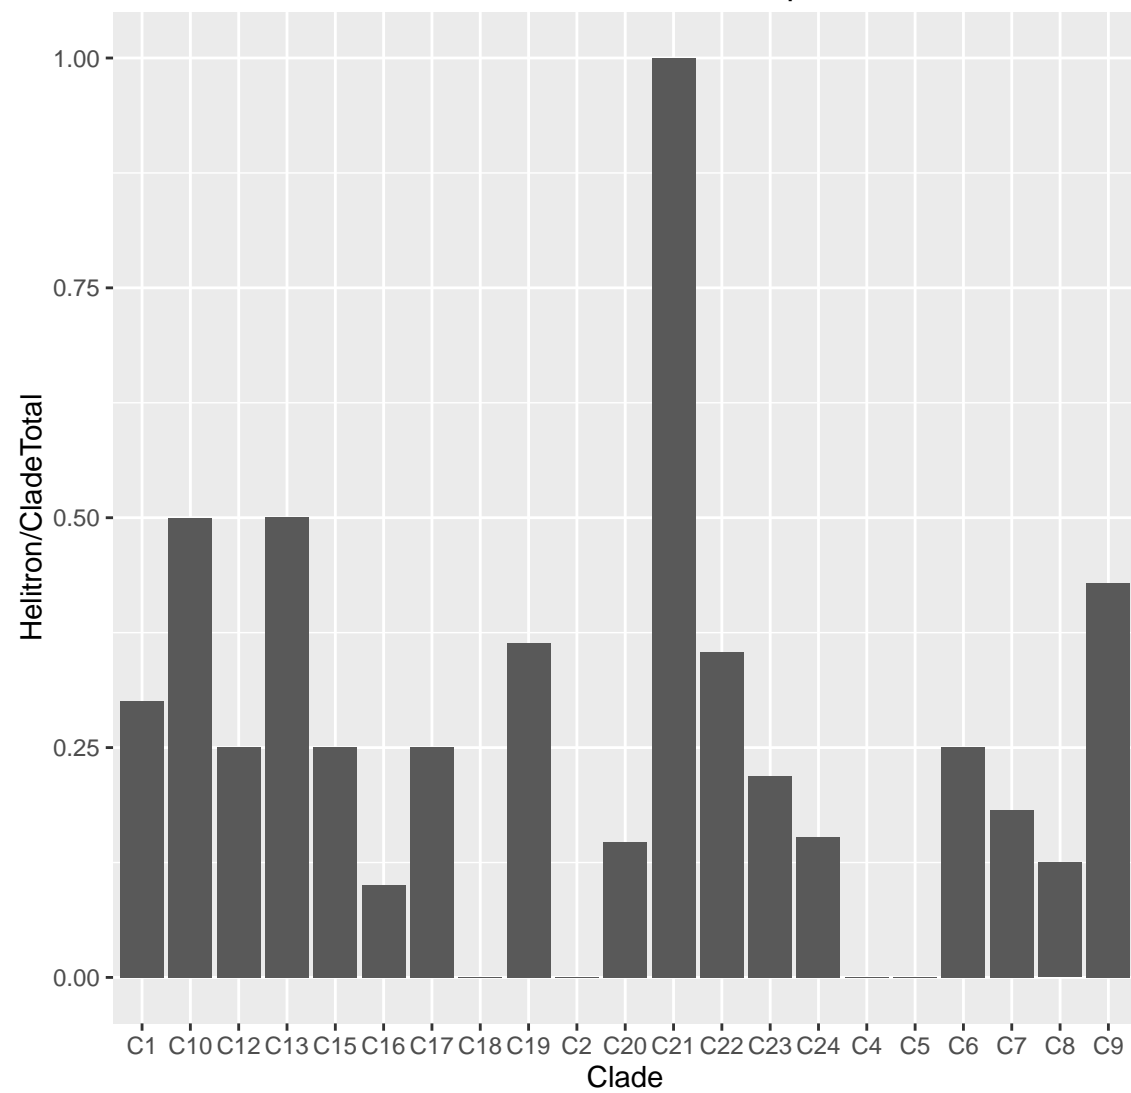

*T. aestivum* – Percent NLRs that overlap with Helitrons

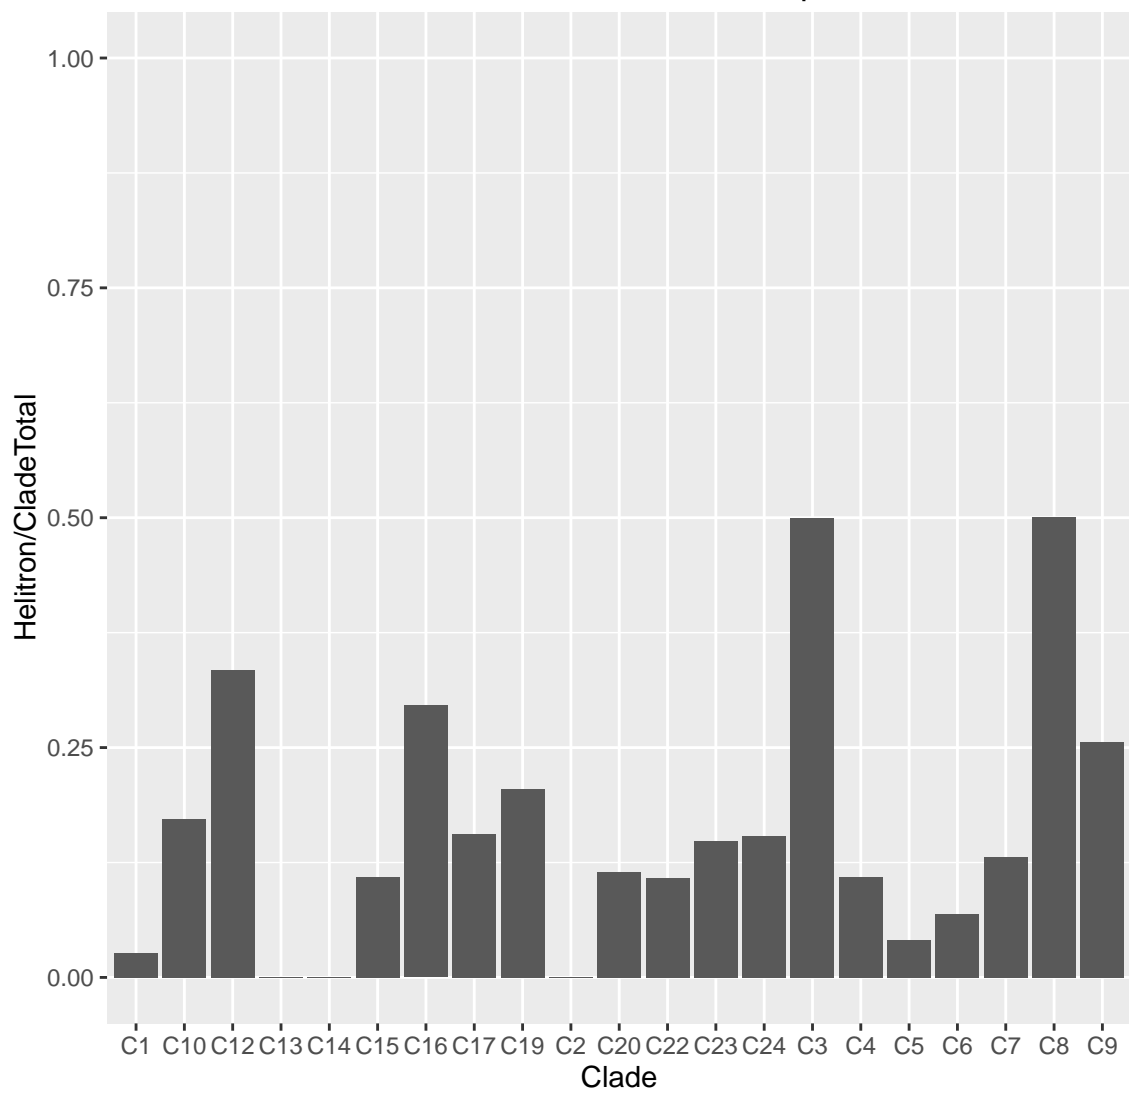

Supplement: 13059_2018_1392_MOESM13_ESM.pdf [file 13059_2018_1392_MOESM13_ESM.pdf]
